# Supplementary material
Source: PubMed Central journal article supplement (PMC6641428)
Supplement: ao7b01648_si_001.pdf [file ao7b01648_si_001.pdf]

## *Supporting Information*

# **Biobased Acrylate Photocurable Resin Formulation for Stereolithography 3D Printing**

Vincent S.D. Voet,<sup>a\*</sup> Tobias Strating,<sup>b</sup> Geraldine H.M. Schnelting,<sup>a</sup> Peter Dijkstra,<sup>c,d</sup> Martin Tietema,<sup>c</sup> Jin Xu,<sup>d</sup> Albert J.J. Woortman,<sup>d</sup> Katja Loos,<sup>d</sup> Jan Jager,<sup>a</sup> and Rudy Folkersma<sup>a</sup>

<sup>a</sup> Professorship Sustainable Polymers, NHL Stenden University of Applied Sciences, van Schaikweg 94, 7811 KL Emmen, The Netherlands

<sup>b</sup> SymbioShape Research and Development, SymbioShape, Agora 4, 8934 CJ Leeuwarden, The Netherlands

<sup>c</sup> KNN Bioplastic, KNN Groep, Duinkerkenstraat 13, 9723 BN Groningen, The Netherlands

<sup>d</sup> Macromolecular Chemistry and New Polymeric Materials, Zernike Institute for Advanced Materials, University of Groningen, Nijenborgh 4, 9747 AG Groningen, The Netherlands

\* Corresponding author: [vincent.voet@stenden.com](mailto:vincent.voet@stenden.com)

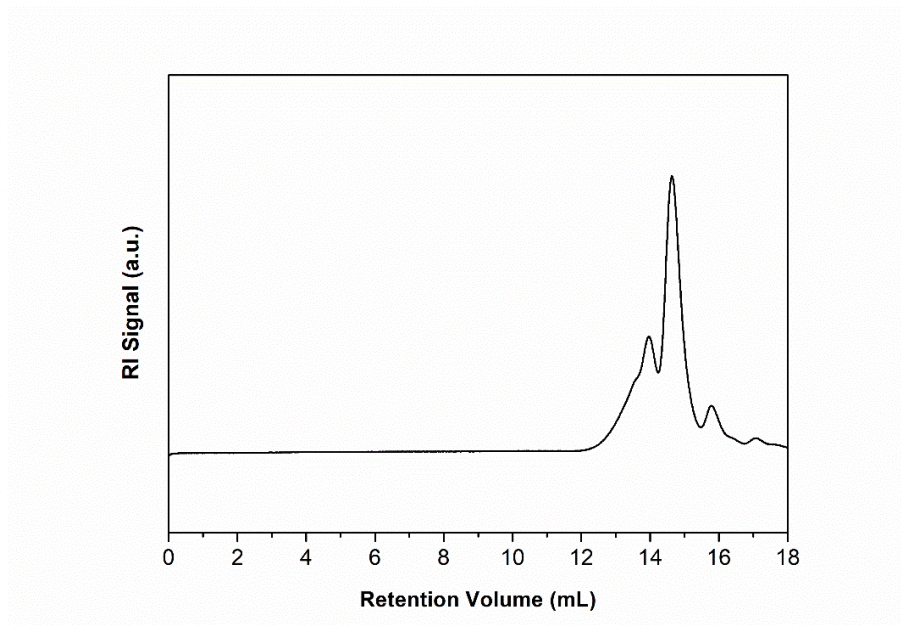

**Figure S1.** GPC trace of multifunctional acrylate oligomer (SA7101, Sartomer,  $M_n = 1.7 \text{ kg}\cdot\text{mol}^{-1}$ ) in DMF.

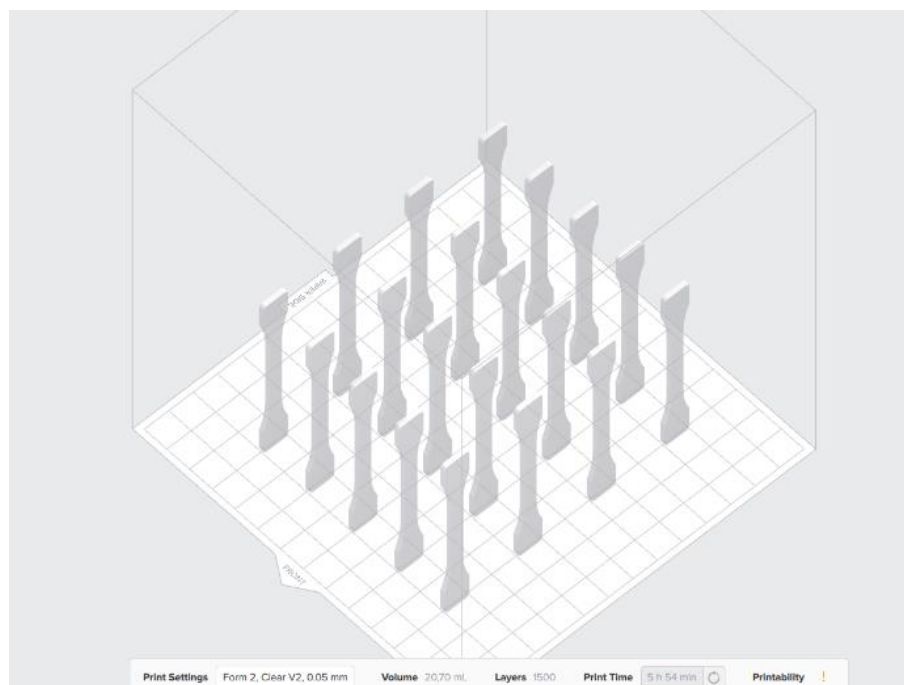

**Figure S2.** Graphic representation of tensile bars (ISO527-2-1BA), modified in PreForm software, with normal orientation to the build direction.

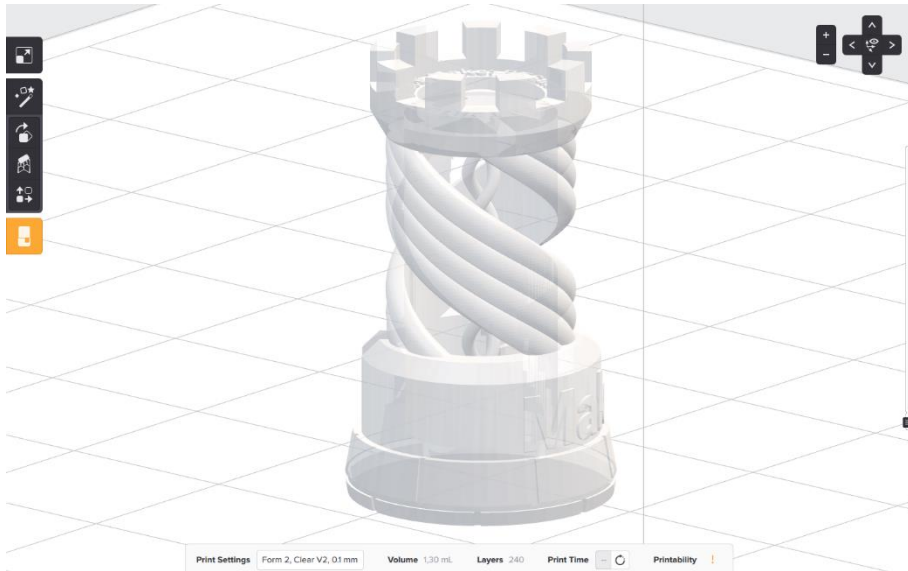

**Figure S3.** Graphic representation of complex shaped prototype with rook tower design, including internal helix structure, modified in PreForm software.

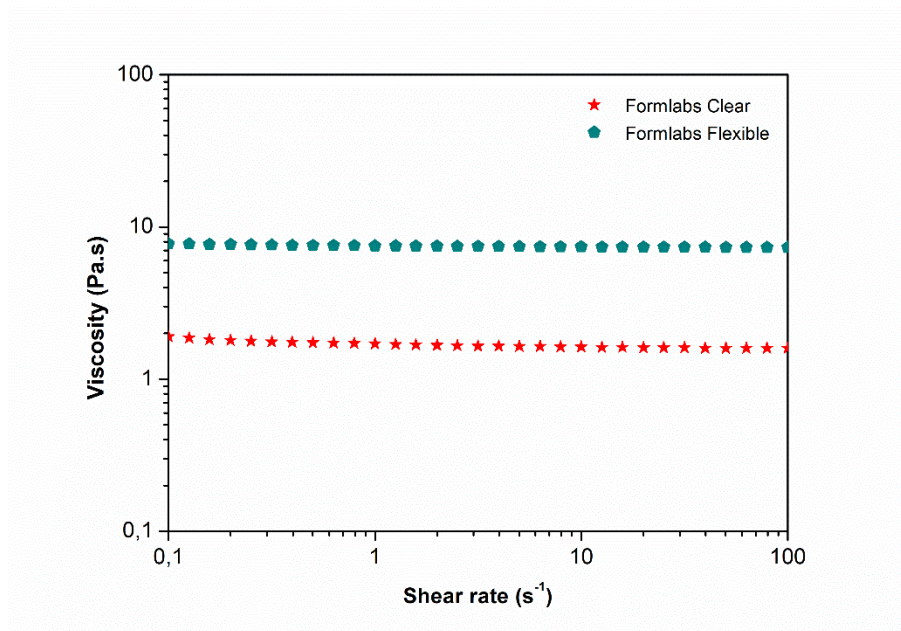

**Figure S4.** Viscosity as a function of shear rate for uncured commercial Formlabs resins.
